# Supplementary material for: The Prevalence and Influencing Factors of Autism Spectrum Disorder among Children in Harbin, China
Source: Research Square preprint supplement (doi:10.21203/rs.3.rs-5655779/v1), 2024-12-24
Supplement: Supplementary file 1 [file fb3cb8bf5c4f4d02e02552c9.docx]

**Appendix 1. Influencing factors from the self-designed Autism Clinical Data Questionnaire (ACDQ)**

| Main question | Items | Option |
| --- | --- | --- |
| Depending on the condition during pregnancy. | Has the mother had regular routine? | 1. YES; 2. NO |
| Has the mother slept well? | 1. YES; 2. NO |
| Has the mother had severe nausea and vomiting during pregnancy? | 1. YES; 2. NO |
| Has the mother had gestational diabetes? | 1. YES; 2. NO |
| Has the mother had hypertension? | 1. YES; 2. NO |
| Has the mother had an infection and sought treatment? | 1. YES; 2. NO |
| Has the mother had autoimmune disease? | 1. YES; 2. NO |
| Has the mother had thyroid disease? | 1. YES; 2. NO |
| Has the mother had threatened abortion? | 1. YES; 2. NO |
| Has the mother had threatened preterm labor? | 1. YES; 2. NO |
| Has the mother had premature rupture of membranes? | 1. YES; 2. NO |
| Has the mother had malposition? | 1. YES; 2. NO |
| Has the mother had a small for gestational age infant? | 1. YES; 2. NO |
| Has the placenta ever been abnormal? | 1. YES; 2. NO |
| Has the fetus had an umbilical cord around its neck? | 1. YES; 2. NO |
| Has the mother ever smoked actively or passively? | 1. YES; 2. NO |
| Has the mother used medicine? | 1. YES; 2. NO |
| Has the mother drunk alcohol? | 1. YES; 2. NO |
| Has the mother ever been exposed to radiation? | 1. YES; 2. NO |
| Has the mother ever suffered a great psychological trauma, such as natural disaster or the death of a loved one? | 1. YES; 2. NO |
| According to the actual condition of your family. | Which of the following options is the best matcher with your family type? | 1. Nuclear families; 2. Three generations cohabit; 3. Step-families; 4. Single parenthood |
| What is your parenting style? | 1. Doting type; 2. Permissive type; 3. Strict type; 4. Authoritative type |
| How about your family relationship? | 1. Harmonious; 2. General; 3. Poor |
| What is your annual household income (yuan)? | 1. <5w; 2. 5-10w; 3. >10w |
| Have your family ever moved house? | 1. YES; 2. NO |
| What is maternal educational level? | 1. Primary school; 2. Junior middle school; 3. senior high school; 4. College; 5. Undergraduate and above |
| What was maternal age at childbirth? | 1. <25 years old; 2. 25-29 years old; 3. 30-34 years old; 4. ≥35 years old |
| What is paternal level of education? | 1. Primary school; 2. Junior middle school; 3. senior high school; 4. College; 5. Undergraduate and above |
| What was paternal age at childbirth? | 1. <25 years old; 2. 25-29 years old; 3. 30-34 years old; 4. ≥35 years old |

**Table S1.** Multivariate analysis of the effect of pregnancy- and family-associated factors on the risk of ASD (forward stepwise model)

| Factors | *OR* | 95% *CI* | *P* |
| --- | --- | --- | --- |
| Severe nausea and vomiting |  |  |  |
| Without | 1.00 | (ref) |  |
| With | 4.23 | (1.43, 12.51) | **0.009** |
| Family types |  |  |  |
| Nuclear families | 1.00 | (ref) |  |
| Three Generations Cohabit | 0.35 | (0.18, 0.71) | **0.003** |
| Step-families | 1.17 | (0.09, 15.90) | 0.904 |
| Single parenthood | 0.76 | (0.07, 8.52) | 0.827 |
| Parenting style |  |  |  |
| Democratic type | 1.00 | (ref) |  |
| Permissive type | 6.52 | (2.26, 18.81) | **0.001** |
| Strict type | 2.52 | (1.08, 5.86) | **0.032** |
| Authoritative type | 1.46 | (0.24, 8.82) | 0.680 |
| Doting type | 8.55 | (3.31, 22.05) | **<0.001** |
| Annual household income |  |  |  |
| >10w | 1.00 | (ref) |  |
| 5-10w | 1.36 | (0.57, 3.28) | 0.491 |
| <5w | 8.69 | (3.51, 21.52) | **<0.001** |

Note: The significate pregnancy risk factors including regular routine, severe nausea and vomiting, infections, nuchal cord, exposure to tobacco, medication use, and psychological trauma, and significant family risk factors including family type, parenting style, family relationships, annual household income, relocation, paternal education level, and maternal education level were as independent variables in the logistic regression model. Bold values indicate *P* < 0.05.
